# Supplementary material for: Integrated Analysis of the miRNA-mRNA Regulatory Network Involved in the HIV-Associated Neurocognitive Disorder
Source: Preprints.org preprint supplement (doi:10.20944/preprints202202.0297.v1), 2022-02-23
Supplement: Supplementary file 1 [file supplementary]

## Sheet: miRNA_down_gene_up_min
Down-regulated miRNAs	Up-regulated mRNAs/genes
hsa-miR-195-5p	DCLK1
hsa-miR-195-5p	DNAJB4
hsa-miR-195-5p	SEL1L3
hsa-miR-195-5p	PARVA
hsa-miR-195-5p	EYA1
hsa-miR-195-5p	SYT4
hsa-miR-195-5p	SEMA3D
hsa-miR-195-5p	ABTB2
hsa-miR-195-5p	CRIM1
hsa-miR-195-5p	TFPI2
hsa-miR-195-5p	MINDY2
hsa-miR-195-5p	DRAM1
hsa-miR-195-5p	PTPN14
hsa-miR-195-5p	KCNIP1
hsa-miR-195-5p	ARRDC4
hsa-miR-195-5p	KCNMA1
hsa-miR-195-5p	EYA4
hsa-miR-195-5p	AHNAK2
hsa-miR-195-5p	MCC
hsa-miR-373-3p	TXNIP
hsa-miR-373-3p	MCC
hsa-miR-373-3p	CADM2
hsa-miR-373-3p	CRIM1
hsa-miR-373-3p	AHNAK
hsa-miR-373-3p	DCLK1
hsa-miR-373-3p	CD44
hsa-miR-373-3p	RAPGEF5
hsa-miR-373-3p	CAVIN1
hsa-miR-373-3p	DNAJB4
mir-103a-2-5p	TENM1
mir-103a-2-5p	LIFR
mir-103a-2-5p	TGFB2
mir-103a-2-5p	LYRM2
mir-103a-2-5p	LONRF2
mir-103a-2-5p	CLVS2
mir-103a-2-5p	PTPN14
mir-103a-2-5p	SERTM1
mir-103a-2-5p	CADM2
mir-103a-2-5p	TXNIP
mir-103a-2-5p	GREM1
mir-103a-2-5p	DNAJC3
mir-103a-2-5p	SULF2
mir-103a-2-5p	RAPGEF5
mir-103a-2-5p	MEST
mir-103a-2-5p	THBS1
mir-103a-2-5p	DRAM1
mir-103a-2-5p	NLGN1
mir-103a-2-5p	PDE5A
mir-103a-2-5p	GLIPR1
mir-103a-2-5p	TLR4
mir-103a-2-5p	PLCE1
mir-103a-2-5p	ANXA5
mir-103a-2-5p	RDH10
mir-103a-2-5p	CALD1
mir-103a-2-5p	USP53
mir-103a-2-5p	HEBP2
mir-103a-2-5p	CCDC80
mir-103a-2-5p	PDLIM3
mir-103a-2-5p	MCAM
mir-103a-2-5p	ZNF322
mir-103a-2-5p	LPP
mir-103a-2-5p	CD44
mir-103a-2-5p	PARVA
mir-103a-2-5p	ERBB4
mir-103a-2-5p	MME
mir-103a-2-5p	NT5DC3
mir-103a-2-5p	MCC
mir-103a-2-5p	CITED2
mir-103a-2-5p	STX7
mir-103a-2-5p	TFPI2
mir-103a-2-5p	GPR22
mir-103a-2-5p	NRXN3
mir-103a-2-5p	PLA2G16
mir-103a-2-5p	CYR61
miR-103a-3p	KCNIP1
miR-103a-3p	DCLK1
miR-103a-3p	DNAJB4
miR-103a-3p	DNAJC3
miR-103a-3p	GREM1
miR-103a-3p	HOXD10
miR-103a-3p	MINDY2
miR-103a-3p	RDH10
miR-103a-3p	NMT2
miR-103a-3p	SEL1L3
miR-103a-3p	CITED2
mir-1203	MCAM
mir-1203	NRXN3
mir-1203	CCDC80
mir-1203	SERPINE1
mir-1203	IQGAP2
mir-1203	ITGA3
mir-1203	SYNJ2
mir-122-3p	PARVA
mir-122-3p	TXNIP
mir-122-3p	LPP
mir-122-3p	PTPN14
mir-122-3p	CD99
mir-122-3p	ZNF322
mir-122-3p	PDLIM3
mir-122-5p	FLNB
mir-122-5p	USP53
mir-122-5p	ZNF322
mir-122-5p	DLG2
mir-122-5p	ERBB4
mir-122-5p	CADM2
mir-122-5p	KRT18
mir-122-5p	CALD1
mir-122-5p	OSMR
mir-122-5p	EYA4
mir-122-5p	AXL
mir-122-5p	MCAM
mir-122-5p	HEBP2
mir-122-5p	CLK4
mir-122-5p	ALOX5AP
mir-1226-3p	DLG2
mir-1226-3p	KCNMA1
mir-1226-3p	DCLK1
mir-1226-3p	GLIPR1
mir-1226-3p	SLC6A17
mir-1226-3p	ZNF322
mir-1226-3p	ANXA2
mir-1226-3p	LONRF2
mir-1226-3p	SERPINE1
mir-1226-3p	LYRM2
mir-1226-3p	NRXN3
mir-1226-3p	GREM1
mir-1226-3p	CYR61
mir-1226-3p	GFRA2
mir-1226-3p	ITGA3
mir-1226-3p	LAYN
mir-1226-3p	PLCE1
mir-1226-3p	FLNB
mir-1226-3p	NT5DC3
mir-1226-3p	ANKRD1
mir-1226-3p	NMT2
mir-1226-3p	CCDC80
mir-1226-3p	HEBP2
mir-1226-3p	DNAJC3
mir-1226-3p	ERBB4
mir-1226-3p	EYA1
mir-1226-3p	STX7
mir-1226-3p	ZNF799
mir-1226-3p	CLVS2
mir-1226-3p	EEA1
mir-1226-3p	PLA2G16
mir-1226-3p	ALOX5AP
mir-1226-3p	BAG2
miR-1226-5p	S100A10
miR-1226-5p	ARHGAP36
miR-1226-5p	GFRA2
miR-1226-5p	SYT17
miR-1226-5p	DRAM1
miR-1226-5p	GLIPR1
miR-1226-5p	LPP
miR-1226-5p	AHNAK2
miR-1226-5p	LIFR
miR-1226-5p	ACHE
miR-1226-5p	DLG2
miR-1226-5p	FLNB
miR-1226-5p	PHLDB2
miR-1226-5p	ERBB4
miR-1226-5p	DCLK1
miR-1226-5p	CD44
miR-1226-5p	LAYN
miR-1226-5p	AHNAK
miR-1226-5p	CADM2
miR-1226-5p	NMT2
miR-1226-5p	FLNC
miR-1226-5p	CCDC80
miR-1226-5p	ITGA3
miR-1226-5p	OSMR
miR-1226-5p	STX7
miR-1226-5p	GPR22
miR-1226-5p	PDLIM3
miR-1226-5p	SERPINB8
miR-1249-5p	HEBP2
miR-1249-5p	FILIP1L
miR-1249-5p	HBEGF
miR-1249-5p	SLC6A17
miR-1249-5p	PARVA
miR-1249-5p	CLVS2
miR-1249-5p	ABTB2
miR-1249-5p	CD177
miR-1249-5p	SYNJ2
miR-1249-5p	MCC
miR-1249-5p	TAGLN
miR-1249-5p	PXDC1
miR-1249-5p	KCNIP1
miR-1249-5p	GREM1
miR-1249-5p	CPA4
miR-1249-5p	CD44
miR-1249-5p	GFRA2
miR-1249-5p	ARHGAP36
miR-1249-5p	AXL
miR-1249-5p	RAPGEF5
miR-1249-5p	LPP
miR-1249-5p	ITGA3
miR-1249-5p	NT5DC3
miR-1249-5p	SERPINE1
miR-1249-5p	FLNB
miR-1249-5p	FLNC
miR-1249-5p	ACHE
miR-1249-5p	CCDC80
miR-1249-5p	TLR4
miR-1249-5p	EEA1
miR-1249-5p	PLA2G16
miR-1249-5p	STX7
miR-1249-5p	THBS1
miR-1249-5p	DNAJB4
mir-126-5p	LPP
mir-126-5p	ATP8B1
mir-126-5p	DNAJB4
mir-126-5p	CALCB
mir-126-5p	LONRF2
mir-126-5p	MINDY2
mir-126-5p	CADM2
mir-126-5p	EYA4
mir-126-5p	GLIPR1
mir-126-5p	PTPN14
mir-126-5p	NECAB1
mir-126-5p	DNAJC3
mir-126-5p	KCNMA1
mir-126-5p	DCLK1
mir-126-5p	HBEGF
mir-126-5p	NRXN3
mir-126-5p	TFPI2
mir-126-5p	CD44
mir-126-5p	HDAC9
mir-126-5p	SEMA3D
mir-126-5p	FAP
mir-126-5p	CFI
mir-126-5p	LYRM2
mir-126-5p	FAM198B
mir-126-5p	FAM200B
mir-126-5p	LAYN
mir-126-5p	EYA1
mir-126-5p	PXDC1
mir-126-5p	ARSJ
mir-126-5p	USP53
mir-126-5p	ZNF799
mir-126-5p	CYR61
mir-126-5p	SERPINE1
mir-126-5p	CCDC80
mir-126-5p	MME
mir-126-5p	PLCE1
mir-126-5p	NLGN1
mir-126-5p	CLVS2
mir-126-5p	PDE5A
mir-126-5p	EEA1
mir-126-5p	PDLIM3
mir-126-5p	CYP24A1
mir-126-5p	CALD1
mir-126-5p	PYGL
mir-126-5p	ERBB4
mir-126-5p	SERPINB8
mir-126-5p	CITED2
mir-126-5p	PHLDB2
mir-126-5p	TGFB2
mir-126-5p	GFRA2
mir-126-5p	AXL
mir-126-5p	STX7
mir-126-5p	LIFR
mir-126-5p	NMT2
mir-126-5p	HEBP2
mir-126-5p	PARVA
mir-126-5p	ITGA3
mir-126-5p	BAG2
mir-126-5p	ANXA5
mir-126-5p	GPR22
mir-126-5p	THBS1
mir-126-5p	TLR4
mir-127-5p	CADM2
mir-127-5p	LPP
mir-127-5p	VIM
mir-127-5p	STK26
mir-127-5p	GFRA2
mir-127-5p	CD99
mir-127-5p	ANKRD1
mir-127-5p	TLR4
mir-127-5p	HIST1H3F
mir-127-5p	EEA1
mir-127-5p	CRIM1
mir-127-5p	NMT2
mir-127-5p	NEXN
mir-127-5p	PARVA
mir-127-5p	SERTM1
mir-127-5p	CLVS2
mir-127-5p	STX7
mir-127-5p	AXL
mir-127-5p	ZNF799
mir-127-5p	LONRF2
mir-127-5p	GREM1
mir-127-5p	LAYN
mir-127-5p	NT5DC3
mir-127-5p	USP53
mir-127-5p	DNAJC3
mir-127-5p	PDE5A
mir-127-5p	CD44
mir-127-5p	EYA4
mir-127-5p	GLIPR1
mir-127-5p	GPR22
mir-127-5p	PDLIM3
mir-127-5p	PLA2G16
mir-127-5p	DNAJB4
mir-127-5p	SYNJ2
miR-133a-3p	IQGAP2
miR-133a-3p	TENM1
miR-133a-3p	EYA4
miR-133a-3p	KCNMA1
miR-133a-3p	EYA1
miR-133a-3p	TGFB2
miR-133a-3p	EEA1
miR-133a-3p	DLG2
miR-133a-3p	DNAJC3
miR-133a-3p	ZNF322
miR-133a-3p	CTGF
miR-133a-3p	PARVA
miR-133a-3p	ANXA2
mir-137	PDLIM3
mir-137	RAPGEF5
mir-137	CADM2
mir-137	DCLK1
mir-137	HOXD10
mir-137	PTPN14
mir-137	GREM1
mir-137	ERBB4
mir-137	GLIPR1
mir-137	BAG2
mir-137	NRXN3
mir-137	ANO4
mir-137	LIFR
mir-137	PHLDB2
mir-137	SLC6A17
mir-137	AHNAK2
mir-137	GPR22
mir-143-3p	DCLK1
mir-143-3p	ANXA3
mir-143-3p	PDE5A
mir-143-3p	ZNF322
mir-143-3p	CD177
mir-143-3p	LIFR
mir-143-3p	SERPINE1
mir-143-3p	PSG4
mir-143-3p	CTGF
mir-143-3p	THBS1
mir-153-3p	DLG2
mir-153-3p	CITED2
mir-153-3p	CADM2
mir-153-3p	DCLK1
mir-153-3p	ZNF799
mir-153-3p	PTPN14
mir-153-3p	SYT4
mir-153-3p	DNAJB4
mir-153-3p	MATN2
mir-153-3p	TGFB2
mir-153-3p	NMT2
miR-154-3p	KCNMA1
miR-154-3p	ATP8B1
miR-154-3p	ABTB2
miR-154-3p	SYT4
mir-154-5p	MINDY2
mir-154-5p	CADM2
mir-154-5p	CD177
mir-154-5p	ARSJ
mir-154-5p	CLVS2
mir-154-5p	NRXN3
mir-154-5p	LPP
mir-154-5p	DCLK1
mir-154-5p	STX7
miR-15b-3p	KCNMA1
miR-15b-3p	TENM1
miR-15b-3p	EYA4
miR-15b-3p	LPP
miR-15b-3p	TCEAL2
miR-15b-3p	SYNJ2
miR-15b-3p	CALD1
miR-15b-3p	CTGF
miR-15b-3p	CADM2
miR-15b-3p	GREM1
miR-15b-3p	SNCAIP
miR-15b-3p	CYP24A1
miR-15b-3p	DNAJB4
miR-15b-3p	LYRM2
miR-15b-3p	CD44
miR-15b-3p	NLGN1
miR-15b-3p	CLVS2
miR-15b-3p	PARVA
miR-15b-3p	PTPN14
miR-15b-3p	GLIPR1
miR-15b-3p	CITED2
miR-15b-3p	MCC
miR-15b-3p	ERBB4
miR-15b-3p	USP53
miR-15b-3p	HDAC9
miR-15b-3p	ZNF799
miR-15b-3p	CPA4
miR-15b-3p	LONRF2
miR-15b-3p	GFRA2
miR-15b-3p	DLG2
miR-15b-3p	HEBP2
miR-15b-3p	DNAJC3
miR-15b-3p	LIFR
miR-15b-3p	STX7
miR-15b-3p	LAYN
miR-15b-3p	BAG2
miR-15b-3p	TLR4
miR-15b-3p	NRXN3
miR-15b-5p	DCLK1
miR-15b-5p	DNAJB4
miR-15b-5p	SEL1L3
miR-15b-5p	PARVA
miR-15b-5p	EYA1
miR-15b-5p	SYT4
miR-15b-5p	SEMA3D
miR-15b-5p	MINDY2
miR-15b-5p	ABTB2
miR-15b-5p	CRIM1
miR-15b-5p	TFPI2
miR-15b-5p	DRAM1
miR-15b-5p	KCNIP1
miR-15b-5p	ARRDC4
miR-15b-5p	KCNMA1
miR-15b-5p	EYA4
miR-15b-5p	PTPN14
miR-15b-5p	AHNAK2
miR-15b-5p	LPP
miR-15b-5p	TXNIP
miR-15b-5p	NLGN1
miR-15b-5p	CD44
miR-15b-5p	USP53
miR-15b-5p	CCDC80
miR-16-5p	DCLK1
miR-16-5p	DNAJB4
miR-16-5p	SEL1L3
miR-16-5p	PARVA
miR-16-5p	EYA1
miR-16-5p	SYT4
miR-16-5p	SEMA3D
miR-16-5p	ABTB2
miR-16-5p	CRIM1
miR-16-5p	TFPI2
miR-16-5p	MINDY2
miR-16-5p	DRAM1
miR-16-5p	KCNIP1
miR-16-5p	ARRDC4
miR-16-5p	KCNMA1
miR-16-5p	EYA4
miR-16-5p	PTPN14
miR-16-5p	AHNAK2
miR-16-5p	LPP
miR-16-5p	TXNIP
miR-16-5p	NLGN1
miR-16-5p	PHLDB2
miR-16-5p	CD44
miR-16-5p	VIM
miR-16-5p	USP53
miR-16-5p	LONRF2
miR-16-5p	CCDC80
mir-181d-3p	PARVA
mir-181d-3p	ARHGAP36
mir-181d-3p	AHNAK
mir-181d-3p	ITGA3
mir-181d-3p	PLA2G16
mir-181d-3p	CYR61
miR-181d-5p	PDE5A
miR-181d-5p	ARSJ
miR-181d-5p	CRIM1
miR-181d-5p	DNAJC3
miR-181d-5p	ABTB2
miR-181d-5p	DCLK1
miR-181d-5p	ITGA3
miR-181d-5p	DLG2
miR-181d-5p	MCC
miR-181d-5p	NMT2
miR-181d-5p	SERPINE1
miR-181d-5p	HDAC9
miR-181d-5p	LPP
miR-181d-5p	GREM1
miR-181d-5p	GPR22
miR-181d-5p	BAG2
miR-181d-5p	ZNF799
miR-181d-5p	IQGAP2
miR-181d-5p	SERTM1
miR-181d-5p	LIFR
miR-181d-5p	MME
miR-181d-5p	ARRDC4
miR-181d-5p	ATP8B1
miR-181d-5p	DRAM1
miR-181d-5p	ACTA2
miR-181d-5p	AHNAK
miR-181d-5p	CYR61
mir-191-3p	MCAM
mir-191-3p	LPP
mir-191-3p	ITGA3
mir-191-3p	DNAJB4
mir-191-5p	RDH10
mir-191-5p	LPP
mir-193-3p	ERBB4
mir-193-3p	LYRM2
mir-193-3p	OSMR
mir-193-3p	USP53
mir-193-3p	TGFB2
mir-193-3p	NLGN1
mir-193-3p	LPP
mir-193-3p	NT5DC3
mir-193-3p	GREM1
miR-195-3p	CADM2
miR-195-3p	MME
miR-195-3p	SLC44A5
miR-195-3p	DCLK1
miR-195-3p	PFDN4
miR-195-3p	TENM1
miR-195-3p	SAMD9L
miR-195-3p	DNAJC3
miR-195-3p	SPART
miR-195-3p	CALD1
miR-195-3p	PDE5A
miR-195-3p	ABTB2
miR-195-3p	DLG2
miR-195-3p	LPP
miR-195-3p	FAP
miR-195-3p	RGS13
miR-195-3p	CLK4
miR-195-3p	CALCB
miR-195-3p	OSMR
miR-195-3p	CTGF
miR-195-3p	BAG2
miR-195-3p	ERBB4
miR-195-3p	NECAB1
miR-195-3p	GLIPR1
miR-195-3p	NLGN1
miR-195-3p	PHLDB2
miR-195-3p	ATP8B1
miR-195-3p	EEA1
miR-195-3p	FAM198B
miR-195-3p	CD44
miR-195-3p	EYA4
miR-195-3p	HDAC9
miR-195-3p	PTPN14
miR-195-3p	TGFB2
miR-195-3p	LONRF2
miR-195-3p	CCDC80
miR-195-3p	LYRM2
miR-195-3p	PLCE1
miR-195-3p	NRXN3
miR-195-3p	NT5DC3
miR-195-3p	CRIM1
miR-195-3p	FLNB
miR-195-3p	HEBP2
miR-195-3p	EYA1
miR-195-3p	SYNJ2
miR-195-3p	SEL1L3
miR-195-3p	STX7
miR-195-3p	RDH10
miR-195-3p	ARSJ
miR-195-3p	PLA2G16
miR-195-3p	PARVA
miR-195-3p	DNAJB4
miR-195-3p	SULF2
miR-195-3p	IQGAP2
miR-195-3p	CITED2
miR-195-3p	TLR4
miR-195-3p	ZNF322
miR-195-3p	ALOX5AP
miR-195-3p	CYR61
miR-195-5p	DCLK1
miR-195-5p	DNAJB4
miR-195-5p	SEL1L3
miR-195-5p	PARVA
miR-195-5p	EYA1
miR-195-5p	SYT4
miR-195-5p	SEMA3D
miR-195-5p	ABTB2
miR-195-5p	CRIM1
miR-195-5p	TFPI2
miR-195-5p	MINDY2
miR-195-5p	DRAM1
miR-195-5p	PTPN14
miR-195-5p	KCNIP1
miR-195-5p	ARRDC4
miR-195-5p	KCNMA1
miR-195-5p	EYA4
miR-195-5p	AHNAK2
miR-195-5p	LPP
miR-195-5p	TXNIP
miR-195-5p	NLGN1
miR-195-5p	USP53
miR-195-5p	CCDC80
mir-196a-5p	EEA1
mir-196a-5p	RDH10
mir-196a-5p	OSMR
mir-196a-5p	CADM2
mir-196a-5p	HDAC9
mir-196a-5p	EYA4
mir-196a-5p	LYRM2
miR-214-3p	PDE5A
miR-214-3p	CPA4
miR-214-3p	HDAC9
miR-214-3p	PTPN14
miR-214-3p	LPP
miR-214-3p	AHNAK2
miR-214-3p	LIFR
miR-214-3p	SEMA3D
miR-214-3p	ZNF322
miR-214-3p	NRXN3
miR-214-3p	ANXA5
miR-214-3p	MCC
miR-214-3p	CD177
miR-214-3p	KCNIP1
miR-214-3p	STX7
miR-214-3p	NLGN1
miR-214-3p	CD99
miR-214-3p	ARHGAP36
miR-214-3p	GFRA2
miR-214-3p	CALD1
miR-214-3p	GREM1
miR-214-3p	DPP4
miR-214-3p	CCDC80
miR-214-3p	HEBP2
miR-214-3p	DCLK1
miR-214-3p	ACHE
miR-214-3p	ZNF799
miR-214-3p	NT5DC3
miR-214-3p	AHNAK
miR-214-3p	DNAJC3
miR-214-3p	CLVS2
miR-214-3p	FLNB
miR-214-3p	ARRDC4
miR-214-3p	PARVA
miR-214-3p	LONRF2
miR-214-3p	EYA4
miR-214-3p	IQGAP2
miR-214-3p	CLK4
miR-214-3p	CITED2
miR-214-3p	PLA2G16
miR-214-3p	TLR4
miR-214-3p	PDLIM3
mir-218-1-3p	MINDY2
mir-218-1-3p	CRIM1
mir-218-1-3p	AHNAK2
mir-218-1-3p	KCNMA1
mir-218-1-3p	NLGN1
mir-218-1-3p	SERPINB8
mir-218-1-3p	RAPGEF5
mir-218-1-3p	FAM200B
mir-218-1-3p	NRXN3
mir-218-1-3p	CPA4
mir-218-1-3p	ERBB4
mir-218-1-3p	PARVA
mir-218-1-3p	SEMA3D
mir-218-1-3p	HDAC9
mir-218-1-3p	CCDC80
mir-218-1-3p	OSMR
mir-218-1-3p	GLIPR1
mir-218-1-3p	MME
mir-218-1-3p	NT5DC3
mir-218-1-3p	HEBP2
mir-218-1-3p	LONRF2
mir-218-1-3p	ZNF799
mir-218-1-3p	PLA2G16
mir-218-1-3p	GPR22
mir-218-1-3p	STX7
mir-218-1-3p	PDLIM3
mir-218-1-3p	TLR4
mir-218-1-3p	DNAJB4
mir-218-5p	MINDY2
mir-218-5p	CADM2
mir-218-5p	HOXD10
mir-218-5p	SLC6A17
mir-218-5p	NMT2
mir-218-5p	DLG2
mir-218-5p	NRXN3
mir-218-5p	GLIPR1
mir-218-5p	MCC
mir-218-5p	ANO4
mir-218-5p	DCLK1
mir-218-5p	LPP
mir-218-5p	TGFB2
mir-218-5p	EYA4
mir-218-5p	RAPGEF5
mir-218-5p	LIFR
mir-218-5p	DNAJC3
mir-218-5p	SNCAIP
mir-218-5p	GREM1
mir-218-5p	NECAB1
mir-218-5p	CTGF
mir-218-5p	MME
mir-218-5p	FLNC
mir-218-5p	ERBB4
mir-218-5p	SULF2
mir-218-5p	PTPN14
mir-218-5p	LYRM2
mir-218-5p	KCNMA1
mir-218-5p	FLNB
mir-218-5p	CD44
mir-218-5p	CCDC80
mir-218-5p	PXDC1
mir-218-5p	ANXA2
mir-218-5p	FAM198B
mir-218-5p	CD99
mir-218-5p	CYP24A1
mir-218-5p	RDH10
mir-219-5p	LPP
mir-219-5p	EYA1
mir-219-5p	MINDY2
mir-219-5p	SYT4
mir-219-5p	DLG2
mir-219-5p	CADM2
miR-221-3p	CLVS2
miR-221-3p	ERBB4
miR-221-3p	MRAP2
miR-221-3p	ANXA3
miR-221-3p	SPART
miR-221-3p	DLG2
miR-221-3p	THBS1
miR-221-3p	LIFR
miR-221-3p	CYR61
miR-221-3p	GPR22
miR-221-5p	SLC6A17
miR-221-5p	PXDC1
miR-221-5p	PARVA
miR-221-5p	LYRM2
miR-221-5p	DLG2
miR-221-5p	DNAJC3
miR-221-5p	DRAM1
miR-221-5p	HOXD10
miR-221-5p	LPP
miR-221-5p	HIST1H3F
miR-221-5p	SYT4
miR-221-5p	MCAM
miR-221-5p	FLNB
miR-221-5p	ABTB2
miR-221-5p	FAM200B
miR-221-5p	HEBP2
miR-221-5p	SULF2
miR-221-5p	ATP8B1
miR-221-5p	CCDC80
miR-221-5p	SERPINB8
miR-221-5p	PTPN14
miR-221-5p	ZNF799
miR-221-5p	SYT17
miR-221-5p	TLR4
miR-221-5p	DCLK1
miR-221-5p	RDH10
miR-221-5p	RAPGEF5
miR-221-5p	CLVS2
miR-221-5p	STX7
miR-221-5p	PLAT
miR-221-5p	CITED2
miR-221-5p	CLK4
miR-221-5p	PLA2G16
miR-221-5p	BAG2
miR-221-5p	CD99
miR-221-5p	DNAJB4
mir-296-5p	CD44
mir-296-5p	CD99
mir-299-3p	DLG2
mir-299-3p	LAYN
mir-299-3p	STX7
mir-299-3p	PARVA
mir-299-3p	PTPN14
miR-299-5p	GFRA2
miR-299-5p	PSG4
miR-299-5p	EYA4
miR-299-5p	STX7
miR-299-5p	ARSJ
miR-299-5p	PHLDB2
miR-299-5p	TGFB2
miR-299-5p	DCLK1
miR-299-5p	IQGAP2
miR-299-5p	DNAJB4
miR-299-5p	HIST1H3F
mir-29b-2-3p	DLG2
mir-29b-2-3p	HBEGF
mir-29b-2-3p	SLC44A5
mir-29b-2-3p	DPP4
mir-29b-2-3p	MEST
mir-29b-2-3p	DCLK1
mir-29b-2-3p	TGFB2
mir-29b-2-3p	ARRDC4
mir-29b-2-3p	ARHGAP36
mir-29b-2-3p	SLC6A17
mir-29b-2-5p	SYT4
mir-29b-2-5p	ARRDC4
mir-29b-2-5p	PFDN4
mir-29b-2-5p	SEMA3D
mir-29b-2-5p	CLVS2
mir-29b-2-5p	GFRA2
mir-29b-2-5p	SYNJ2
mir-29b-2-5p	PARVA
mir-29b-2-5p	HIST1H3F
mir-29b-2-5p	GLIPR1
mir-29b-2-5p	SYT17
mir-29b-2-5p	NEXN
mir-29b-2-5p	RDH10
mir-29b-2-5p	NMT2
mir-29b-2-5p	LPP
mir-29b-2-5p	CLK4
mir-29b-2-5p	GREM1
mir-29b-2-5p	DNAJB4
mir-29b-2-5p	PTPN14
mir-29b-2-5p	THBS1
mir-29b-2-5p	ERBB4
mir-29b-2-5p	NECAB1
mir-29b-2-5p	BAG2
mir-29b-2-5p	ZNF799
mir-29b-2-5p	PHLDB2
mir-29b-2-5p	NLGN1
mir-29b-2-5p	MCAM
mir-29b-2-5p	TFPI2
mir-29b-2-5p	CADM2
mir-29b-2-5p	LIFR
mir-29b-2-5p	KCNIP1
mir-29b-2-5p	OSMR
mir-29b-2-5p	MCC
mir-29b-2-5p	EYA4
mir-29b-2-5p	CCDC80
mir-29b-2-5p	DCLK1
mir-29b-2-5p	TLR4
mir-29b-2-5p	LAYN
mir-29b-2-5p	PLA2G16
mir-29b-2-5p	STX7
mir-29b-2-5p	GPR22
mir-29b-2-5p	NRXN3
mir-29b-2-5p	PDLIM3
mir-29b-2-5p	ALOX5AP
miR-30d-3p	SYT4
miR-30d-3p	TENM1
miR-30d-3p	CCDC80
miR-30d-3p	SYNJ2
miR-30d-3p	DNAJB4
miR-30d-3p	MINDY2
miR-30d-3p	SERPINE1
miR-30d-3p	EYA1
miR-30d-3p	ERBB4
miR-30d-3p	MATN2
miR-30d-3p	LAYN
miR-30d-3p	PARVA
miR-30d-3p	ARSJ
miR-30d-3p	LPP
miR-30d-3p	CALCB
miR-30d-3p	GREM1
miR-30d-3p	DLG2
miR-30d-3p	SULF2
miR-30d-3p	LYRM2
miR-30d-3p	STK26
miR-30d-3p	HBEGF
miR-30d-3p	DCLK1
miR-30d-3p	CLVS2
miR-30d-3p	MME
miR-30d-3p	PDE5A
miR-30d-3p	STX7
miR-30d-3p	EEA1
miR-30d-3p	FAP
miR-30d-3p	PLCE1
miR-30d-3p	ZNF799
miR-30d-3p	CD44
miR-30d-3p	DNAJC3
miR-30d-3p	DRAM1
miR-30d-3p	AHNAK
miR-30d-3p	LONRF2
miR-30d-3p	MCC
miR-30d-3p	EYA4
miR-30d-3p	LIFR
miR-30d-3p	ARRDC4
miR-30d-3p	SEMA3D
miR-30d-3p	NLGN1
miR-30d-3p	MCAM
miR-30d-3p	TFPI2
miR-30d-3p	FAM198B
miR-30d-3p	ABTB2
miR-30d-3p	CADM2
miR-30d-3p	TGFB2
miR-30d-3p	NECAB1
miR-30d-3p	PTPN14
miR-30d-3p	SERPINB8
miR-30d-3p	THBS1
miR-30d-3p	HEBP2
miR-30d-3p	GLIPR1
miR-30d-3p	PLA2G16
miR-30d-3p	PHLDB2
miR-30d-3p	BAG2
miR-30d-3p	CITED2
miR-30d-3p	ZNF322
miR-30d-3p	CTGF
miR-30d-3p	CD99
miR-30d-3p	ANXA5
miR-30d-3p	TLR4
miR-30d-3p	GPR22
miR-30d-3p	NRXN3
miR-30d-5p	ANO4
miR-30d-5p	CYP24A1
miR-30d-5p	HDAC9
miR-30d-5p	FAP
miR-30d-5p	VIM
miR-30d-5p	EEA1
miR-30d-5p	LPP
miR-30d-5p	TENM1
miR-30d-5p	NLGN1
miR-30d-5p	LIFR
miR-30d-5p	CADM2
miR-30d-5p	SPART
miR-30d-5p	NRXN3
miR-30d-5p	SEL1L3
miR-30d-5p	NT5DC3
miR-30d-5p	PDE5A
miR-30d-5p	TFPI2
miR-30d-5p	CALD1
miR-30d-5p	CCDC80
miR-30d-5p	MCC
miR-30d-5p	DNAJC3
miR-30d-5p	STX7
miR-30d-5p	SERPINE1
miR-30d-5p	ATP8B1
miR-30d-5p	AHNAK
miR-30d-5p	NECAB1
mir-323-3p	SYNJ2
mir-323-3p	LIFR
mir-323-3p	PXDC1
mir-323-3p	CLVS2
mir-323-3p	USP53
mir-323-3p	TGFB2
mir-323-3p	GPR22
mir-323-3p	EEA1
mir-323-3p	GREM1
mir-323-3p	ERBB4
miR-329-3p	PDE5A
miR-329-3p	MCAM
miR-329-3p	AHNAK
miR-329-3p	DCLK1
miR-329-3p	SLC6A17
miR-329-3p	KCNMA1
miR-329-3p	CPA4
miR-329-3p	PLAT
miR-329-3p	CD177
miR-329-3p	CTGF
miR-329-3p	NECAB1
miR-329-3p	CD99
miR-329-3p	SYT17
miR-329-5p	GREM1
miR-329-5p	NECAB1
miR-329-5p	ARSJ
miR-329-5p	MINDY2
miR-329-5p	IQGAP2
miR-329-5p	EEA1
miR-329-5p	CADM2
miR-329-5p	FAM200B
miR-329-5p	LPP
miR-329-5p	NEXN
miR-329-5p	OSMR
miR-329-5p	EYA4
miR-329-5p	FAP
miR-329-5p	TXNIP
miR-329-5p	LYRM2
miR-329-5p	ZNF322
miR-329-5p	PLCE1
miR-329-5p	CALCB
miR-329-5p	HOXD10
miR-329-5p	GLIPR1
miR-329-5p	SLC44A5
miR-329-5p	USP53
miR-329-5p	THBS1
miR-329-5p	NRXN3
miR-329-5p	TENM1
miR-329-5p	NT5DC3
miR-329-5p	MCC
miR-329-5p	ZNF799
miR-329-5p	LONRF2
miR-329-5p	MME
miR-329-5p	RDH10
miR-329-5p	CALD1
miR-329-5p	FAM198B
miR-329-5p	ITGA3
miR-329-5p	LAYN
miR-329-5p	PARVA
miR-329-5p	EYA1
miR-329-5p	SERPINB8
miR-329-5p	CLK4
miR-329-5p	CCDC80
miR-329-5p	SERPINE1
miR-329-5p	PDE5A
miR-329-5p	HEBP2
miR-329-5p	TLR4
miR-329-5p	CITED2
miR-329-5p	STX7
miR-329-5p	BAG2
miR-329-5p	GPR22
miR-329-5p	PLA2G16
miR-329-5p	PDLIM3
miR-329-5p	CD99
mir-331-3p	CRIM1
mir-331-3p	THBS1
mir-331-3p	DLG2
mir-331-3p	SLC6A17
miR-331-5p	TLR4
miR-331-5p	PDLIM3
miR-331-5p	LPP
miR-331-5p	SPART
miR-331-5p	SYT4
miR-331-5p	ARRDC4
miR-331-5p	CADM2
miR-331-5p	OSMR
miR-331-5p	FAM200B
miR-331-5p	CD99
miR-331-5p	ALOX5AP
miR-331-5p	ERBB4
miR-331-5p	MRAP2
miR-331-5p	CYR61
miR-331-5p	DPP4
miR-331-5p	GREM1
miR-331-5p	ANKRD1
miR-331-5p	STX7
miR-331-5p	FAM198B
miR-331-5p	EYA4
miR-331-5p	LIFR
miR-331-5p	ZNF799
miR-331-5p	THBS1
miR-331-5p	CD44
miR-331-5p	MCC
miR-331-5p	SERPINE1
miR-331-5p	CLVS2
miR-331-5p	SULF2
miR-331-5p	TGFB2
miR-331-5p	HDAC9
miR-331-5p	EEA1
miR-331-5p	PTPN14
miR-331-5p	CCDC80
miR-331-5p	DNAJB4
miR-331-5p	MME
miR-331-5p	RAPGEF5
miR-331-5p	TENM1
miR-331-5p	BAG2
miR-331-5p	GPR22
miR-331-5p	NRXN3
mir-361-5p	CADM2
mir-361-5p	GLIPR1
mir-361-5p	EEA1
mir-361-5p	ERBB4
mir-361-5p	MINDY2
mir-361-5p	HDAC9
mir-361-5p	STX7
mir-361-5p	SERTM1
mir-361-5p	CD177
mir-361-5p	GPR22
mir-361-5p	TGFB2
miR-373-5p	EEA1
miR-373-5p	CALCB
miR-373-5p	SERPINB8
miR-373-5p	SYT4
miR-373-5p	LONRF2
miR-373-5p	TXNIP
miR-373-5p	CPA4
miR-373-5p	LPP
miR-373-5p	OSMR
miR-373-5p	NRXN3
miR-373-5p	CLVS2
miR-373-5p	NT5DC3
miR-373-5p	MCC
miR-373-5p	DNAJC3
miR-373-5p	PTPN14
miR-373-5p	RGS13
miR-373-5p	LYRM2
miR-373-5p	MINDY2
miR-373-5p	CLK4
miR-373-5p	PDLIM3
miR-373-5p	HDAC9
miR-373-5p	ANKRD1
miR-373-5p	PDE5A
miR-373-5p	CADM2
miR-373-5p	CITED2
miR-373-5p	SEMA3D
miR-373-5p	FAM198B
miR-373-5p	ERBB4
miR-373-5p	SYNJ2
miR-373-5p	HIST1H3F
miR-373-5p	MME
miR-373-5p	SLC44A5
miR-373-5p	NECAB1
miR-373-5p	DNAJB4
miR-373-5p	PLCE1
miR-373-5p	STX7
miR-373-5p	CD44
miR-373-5p	GLIPR1
miR-373-5p	DCLK1
miR-373-5p	ZNF799
miR-373-5p	NMT2
miR-373-5p	GREM1
miR-373-5p	TLR4
miR-373-5p	CCDC80
miR-373-5p	RAPGEF5
miR-373-5p	PARVA
miR-373-5p	GFRA2
miR-373-5p	TGFB2
miR-373-5p	ATP8B1
miR-373-5p	THBS1
miR-373-5p	DLG2
miR-373-5p	DRAM1
miR-373-5p	EYA4
miR-373-5p	TFPI2
miR-373-5p	NLGN1
miR-373-5p	LIFR
miR-373-5p	ITGA3
miR-373-5p	CRIM1
miR-373-5p	CYP24A1
miR-373-5p	SLC6A17
miR-373-5p	HEBP2
miR-373-5p	ANXA5
miR-373-5p	PLA2G16
miR-373-5p	CYR61
miR-373-5p	ZNF322
miR-376a-3p	GLIPR1
miR-376a-3p	USP53
miR-376a-3p	SYT4
miR-376a-3p	PARVA
miR-376a-3p	IQGAP2
miR-376a-3p	CLVS2
miR-376a-3p	SEMA3D
miR-376a-3p	OSMR
miR-376a-3p	LAYN
miR-376a-3p	HDAC9
miR-376a-3p	HBEGF
miR-376a-3p	GPR22
miR-376a-3p	LPP
miR-376a-5p	CD99
miR-376a-5p	SERPINB8
miR-376a-5p	LYRM2
miR-376a-5p	RGS13
miR-376a-5p	S100A10
miR-376a-5p	GTSF1
miR-376a-5p	LPP
miR-376a-5p	DNAJC3
miR-376a-5p	ZNF322
miR-376a-5p	OSMR
miR-376a-5p	SERTM1
miR-376a-5p	HIST1H3F
miR-376a-5p	HBEGF
miR-376a-5p	CALD1
miR-376a-5p	GREM1
miR-376a-5p	CADM2
miR-376a-5p	PLCE1
miR-376a-5p	FAM198B
miR-376a-5p	ARSJ
miR-376a-5p	NRXN3
miR-376a-5p	FAM200B
miR-376a-5p	PDLIM3
miR-376a-5p	LIFR
miR-376a-5p	NT5DC3
miR-376a-5p	ERBB4
miR-376a-5p	LONRF2
miR-376a-5p	HEBP2
miR-376a-5p	NLGN1
miR-376a-5p	DCLK1
miR-376a-5p	CLVS2
miR-376a-5p	PDE5A
miR-376a-5p	SERPINE1
miR-376a-5p	CLK4
miR-376a-5p	STX7
miR-376a-5p	GPR22
miR-376a-5p	PLA2G16
miR-376a-5p	DNAJB4
miR-376a-5p	PHLDB2
mir-378a-3p	KCNMA1
mir-378a-3p	PARVA
mir-378a-3p	TXNIP
mir-378a-3p	VIM
mir-378a-3p	TGFB2
mir-378a-5p	MCC
mir-378a-5p	MINDY2
mir-378a-5p	DPP4
mir-378a-5p	SERPINE1
mir-378a-5p	LONRF2
mir-378a-5p	TENM1
mir-378a-5p	LYRM2
mir-378a-5p	HIST1H3F
mir-378a-5p	GREM1
mir-378a-5p	MRAP2
mir-378a-5p	CD177
mir-378a-5p	RDH10
mir-378a-5p	SEMA3D
mir-378a-5p	MCAM
mir-378a-5p	PLAT
mir-378a-5p	CTGF
mir-378a-5p	ARHGAP36
mir-378a-5p	CITED2
mir-378a-5p	FLNC
mir-378a-5p	HBEGF
mir-378a-5p	NT5DC3
mir-378a-5p	NMT2
mir-378a-5p	LPP
mir-378a-5p	ERBB4
mir-378a-5p	CD44
mir-378a-5p	SULF2
mir-378a-5p	THBS1
mir-378a-5p	FLNB
mir-378a-5p	SNCAIP
mir-378a-5p	RAPGEF5
mir-378a-5p	ATP8B1
mir-378a-5p	PARVA
mir-378a-5p	GLIPR1
mir-378a-5p	NECAB1
mir-378a-5p	ITGA3
mir-378a-5p	DNAJC3
mir-378a-5p	EEA1
mir-378a-5p	HEBP2
mir-378a-5p	PLA2G16
mir-378a-5p	CCDC80
mir-378a-5p	TFPI2
mir-378a-5p	MATN2
mir-378a-5p	CD99
mir-378a-5p	ALOX5AP
mir-378a-5p	STX7
mir-378a-5p	PDLIM3
mir-378a-5p	SYNJ2
mir-378a-5p	EYA4
miR-379-3p	NLGN1
miR-379-3p	PFDN4
miR-379-3p	USP53
miR-379-3p	CLVS2
miR-379-3p	ERBB4
miR-379-3p	MINDY2
miR-379-3p	LPP
miR-379-3p	NRXN3
miR-379-3p	LONRF2
miR-379-3p	CTGF
miR-379-3p	THBS1
miR-379-5p	HBEGF
miR-379-5p	TFPI2
miR-379-5p	PTPN14
miR-379-5p	TENM1
miR-379-5p	MCC
miR-379-5p	CD44
miR-380-3p	LPP
miR-380-3p	CALD1
miR-380-3p	NLGN1
miR-380-3p	ANXA5
miR-380-3p	CLVS2
miR-380-3p	NRXN3
miR-380-3p	PDE5A
miR-380-3p	HDAC9
miR-380-3p	USP53
miR-380-3p	PFDN4
miR-380-3p	ZNF799
miR-380-3p	PARVA
miR-380-3p	SYT17
miR-380-3p	EEA1
miR-380-3p	SEL1L3
miR-380-3p	SYT4
miR-380-3p	FILIP1L
miR-380-3p	ERBB4
miR-380-3p	GLIPR1
miR-380-3p	PTPN14
miR-380-3p	PLCE1
miR-380-3p	PDLIM3
miR-380-3p	STX7
miR-380-3p	EYA1
miR-380-3p	THBS1
miR-380-3p	SERPINB8
miR-380-3p	ATP8B1
miR-380-3p	AHNAK2
miR-380-3p	DLG2
miR-380-3p	FLNB
miR-380-3p	LIFR
miR-380-3p	MCC
miR-380-3p	EYA4
miR-380-3p	RAPGEF5
miR-380-3p	NMT2
miR-380-3p	MME
miR-380-3p	LONRF2
miR-380-3p	DCLK1
miR-380-3p	DNAJB4
miR-380-3p	HEBP2
miR-380-3p	GFRA2
miR-380-3p	TFPI2
miR-380-3p	PLA2G16
miR-380-3p	CLK4
miR-380-3p	BAG2
miR-380-5p	USP53
miR-380-5p	MCC
miR-380-5p	LYRM2
miR-380-5p	CLVS2
miR-380-5p	ARSJ
miR-380-5p	TENM1
miR-380-5p	LPP
miR-380-5p	PXDC1
miR-380-5p	CPA4
miR-380-5p	ACHE
miR-380-5p	PLCE1
miR-380-5p	CADM2
miR-380-5p	TLR4
miR-380-5p	LONRF2
miR-380-5p	PTPN14
miR-380-5p	HEBP2
miR-380-5p	DLG2
miR-380-5p	STX7
miR-380-5p	DNAJB4
hsa-miR-381-3p	GREM1
hsa-miR-381-3p	ITGA3
miR-381-5p	SYNJ2
miR-381-5p	SULF2
miR-382-3p	NLGN1
miR-382-3p	DCLK1
miR-382-3p	DNAJB4
miR-382-3p	PFDN4
miR-382-3p	DNAJC3
miR-382-3p	KCNMA1
miR-382-3p	CLVS2
miR-382-3p	STX7
miR-382-3p	PHLDB2
miR-382-5p	SYT4
miR-382-5p	ATP8B1
miR-382-5p	CYP24A1
miR-382-5p	ANO4
miR-382-5p	NRXN3
miR-382-5p	BAG2
miR-382-5p	PDE5A
miR-382-5p	LPP
miR-382-5p	SYNJ2
miR-382-5p	HIST1H3F
miR-410-3p	FAM200B
miR-410-3p	CADM2
miR-410-3p	HBEGF
miR-410-3p	PUM3
miR-410-3p	CRIM1
miR-410-3p	MINDY2
miR-410-3p	STK26
miR-410-3p	EEA1
miR-410-3p	USP53
miR-410-3p	NRXN3
miR-410-3p	ARRDC4
miR-410-3p	MCAM
miR-410-3p	THBS1
miR-410-3p	ARSJ
miR-410-3p	CCDC80
miR-410-3p	STX7
miR-410-5p	CADM2
miR-410-5p	LYRM2
miR-410-5p	KCNIP1
miR-410-5p	DLG2
miR-410-5p	GREM1
miR-410-5p	TLR4
miR-410-5p	STX7
miR-410-5p	LPP
miR-410-5p	DNAJC3
miR-410-5p	GLIPR1
miR-410-5p	LAYN
miR-410-5p	HEBP2
miR-410-5p	MME
miR-410-5p	ARSJ
miR-410-5p	ERBB4
miR-410-5p	ITGA3
miR-410-5p	PLA2G16
mir-411-3p	NLGN1
mir-411-3p	PFDN4
mir-411-3p	USP53
mir-411-3p	CLVS2
mir-411-3p	ERBB4
mir-411-3p	MINDY2
mir-411-3p	LPP
mir-411-3p	NRXN3
mir-411-3p	LONRF2
mir-411-3p	CTGF
mir-411-3p	THBS1
miR-411-5p	PXDC1
miR-411-5p	LPP
miR-411-5p	SYT4
miR-411-5p	NECAB1
miR-411-5p	ERBB4
miR-411-5p	MINDY2
miR-411-5p	PTPN14
mir-425-3p	PTPN14
mir-425-3p	PARVA
mir-425-3p	CLK4
mir-425-3p	STX7
mir-425-5p	MINDY2
mir-425-5p	RGS13
mir-425-5p	ANKRD1
mir-425-5p	NT5DC3
mir-425-5p	SERPINE1
mir-425-5p	ANXA2
mir-425-5p	CLVS2
mir-425-5p	ARHGAP36
mir-425-5p	LPP
mir-432-3p	HOXD10
mir-432-3p	ERBB4
mir-432-3p	CADM2
mir-432-3p	DNAJB4
mir-432-3p	MME
mir-432-3p	SYT17
mir-432-3p	LONRF2
mir-432-3p	RDH10
mir-432-3p	LPP
mir-432-3p	MCC
mir-432-3p	CD177
mir-432-3p	PLAT
mir-432-3p	TXNIP
mir-432-3p	DCLK1
mir-432-3p	SAMD9L
mir-432-3p	GREM1
mir-432-3p	MCAM
mir-432-3p	FAM200B
mir-432-3p	GFRA2
mir-432-3p	FLNB
mir-432-3p	EYA4
mir-432-3p	HEBP2
mir-432-3p	ITGA3
mir-432-3p	SULF2
mir-432-3p	PTPN14
mir-432-3p	TGFB2
mir-432-3p	CITED2
mir-432-3p	EEA1
mir-432-3p	STX7
mir-432-5p	ERBB4
mir-432-5p	SERPINE1
mir-432-5p	AXL
mir-432-5p	LPP
mir-432-5p	RDH10
mir-432-5p	PARVA
mir-432-5p	LYRM2
mir-432-5p	SERTM1
mir-432-5p	SYNJ2
mir-432-5p	NRXN3
mir-432-5p	KCNIP1
mir-432-5p	SEMA3D
mir-432-5p	ZNF799
mir-432-5p	MCC
mir-432-5p	SEL1L3
mir-432-5p	FAM198B
mir-432-5p	DCLK1
mir-432-5p	SLC6A17
mir-432-5p	GFRA2
mir-432-5p	CADM2
mir-432-5p	CCDC80
mir-432-5p	ABTB2
mir-432-5p	DNAJC3
mir-432-5p	LIFR
mir-432-5p	ITGA3
mir-432-5p	PLA2G16
mir-432-5p	STX7
mir-432-5p	TLR4
mir-432-5p	DNAJB4
mir-432-5p	PDLIM3
mir-432-5p	PHLDB2
mir-483-5p	SERPINE1
mir-483-5p	HIST1H3F
mir-483-5p	CITED2
mir-483-5p	HBEGF
mir-483-5p	PLCE1
mir-483-5p	PTPN14
mir-483-5p	MCAM
mir-483-5p	ACHE
mir-483-5p	LPP
mir-483-5p	PARVA
mir-483-5p	LAYN
mir-483-5p	CD99
mir-483-5p	DNAJB4
miR-487a-3p	KCNMA1
miR-487a-3p	ATP8B1
miR-487a-3p	ABTB2
miR-487a-3p	SYT4
miR-487a-5p	GLIPR1
miR-487a-5p	SEMA3D
miR-487a-5p	DCLK1
miR-487a-5p	RDH10
miR-487a-5p	CD44
miR-487a-5p	KCNIP1
miR-487a-5p	BAG2
miR-487a-5p	LONRF2
miR-487a-5p	CADM2
miR-487a-5p	ANXA5
miR-487a-5p	FAM198B
miR-487a-5p	SYT4
miR-487a-5p	STX7
miR-487a-5p	CLVS2
miR-487a-5p	LPP
miR-487a-5p	ERBB4
miR-487a-5p	LYRM2
miR-487a-5p	CALD1
miR-487a-5p	NRXN3
miR-487a-5p	PTPN14
miR-487a-5p	CRIM1
miR-487a-5p	DLG2
miR-487a-5p	SULF2
miR-487a-5p	EYA4
miR-487a-5p	PDE5A
miR-487a-5p	NT5DC3
miR-487a-5p	PLCE1
miR-487a-5p	GFRA2
miR-487a-5p	NECAB1
miR-487a-5p	FLNB
miR-487a-5p	TGFB2
miR-487a-5p	CLK4
miR-487a-5p	ITGA3
miR-487a-5p	PLA2G16
miR-487a-5p	CD99
miR-487a-5p	ZNF322
miR-487a-5p	TLR4
miR-487a-5p	DNAJB4
miR-487b-3p	THBS1
miR-487b-5p	GLIPR1
miR-487b-5p	SEMA3D
miR-487b-5p	DCLK1
miR-487b-5p	RDH10
miR-487b-5p	CD44
miR-487b-5p	KCNIP1
miR-487b-5p	BAG2
miR-487b-5p	LONRF2
miR-487b-5p	CADM2
miR-487b-5p	ANXA5
miR-487b-5p	FAM198B
miR-487b-5p	SYT4
miR-487b-5p	STX7
miR-487b-5p	CLVS2
miR-487b-5p	LPP
miR-487b-5p	ERBB4
miR-487b-5p	LYRM2
miR-487b-5p	NRXN3
miR-487b-5p	CALD1
miR-487b-5p	PTPN14
miR-487b-5p	CRIM1
miR-487b-5p	SULF2
miR-487b-5p	DLG2
miR-487b-5p	EYA4
miR-487b-5p	PDE5A
miR-487b-5p	NECAB1
miR-487b-5p	GFRA2
miR-487b-5p	NT5DC3
miR-487b-5p	PLCE1
miR-487b-5p	FLNB
miR-487b-5p	TGFB2
miR-487b-5p	CLK4
miR-487b-5p	ITGA3
miR-487b-5p	PLA2G16
miR-487b-5p	ZNF322
miR-487b-5p	CD99
miR-487b-5p	DNAJB4
miR-487b-5p	TLR4
mir-494-3p	RDH10
mir-494-3p	CLVS2
mir-494-3p	RAPGEF5
mir-494-3p	SLC44A5
mir-494-3p	DCLK1
mir-494-3p	PTPN14
mir-494-3p	HDAC9
mir-494-3p	SERPINE1
mir-494-3p	MINDY2
mir-494-3p	DNAJC3
mir-494-3p	TCEAL2
mir-494-3p	KCNMA1
mir-494-3p	ARSJ
mir-494-3p	LPP
mir-494-3p	ERBB4
mir-494-3p	PARVA
mir-494-3p	TGFB2
mir-494-3p	PFDN4
mir-494-3p	LONRF2
mir-494-3p	GLIPR1
mir-494-3p	CD44
mir-494-3p	MCC
mir-494-3p	ARHGAP36
mir-495-3p	MINDY2
mir-495-3p	NRXN3
mir-495-3p	NLGN1
mir-495-3p	HBEGF
mir-495-3p	TENM1
mir-495-3p	HDAC9
mir-495-3p	DNAJC3
mir-495-3p	RDH10
mir-495-3p	GPR22
mir-495-3p	LIFR
mir-495-3p	SLC44A5
mir-495-3p	NMT2
mir-495-3p	TGFB2
mir-495-3p	EYA4
mir-495-3p	ALOX5AP
mir-495-3p	LAYN
mir-495-3p	CITED2
mir-495-3p	CADM2
mir-495-3p	SULF2
mir-495-3p	STX7
mir-495-3p	NECAB1
mir-495-3p	PDE5A
mir-495-3p	SPART
mir-495-3p	LPP
mir-495-3p	KCNIP1
mir-495-3p	CRIM1
mir-495-3p	SEMA3D
mir-495-3p	ERBB4
mir-495-3p	EEA1
mir-495-3p	TXNIP
miR-495-5p	SYT4
miR-495-5p	ANXA3
miR-495-5p	BAG2
miR-495-5p	MEST
miR-495-5p	HIST1H3F
miR-495-5p	FILIP1L
miR-495-5p	NECAB1
miR-495-5p	GLIPR1
miR-495-5p	CYP24A1
miR-495-5p	SEMA3D
miR-495-5p	PHLDB2
miR-495-5p	CCDC80
miR-495-5p	RAPGEF5
miR-495-5p	GREM1
miR-495-5p	DNAJC3
miR-495-5p	LAYN
miR-495-5p	ABTB2
miR-495-5p	LPP
miR-495-5p	CITED2
miR-495-5p	CRIM1
miR-495-5p	NT5DC3
miR-495-5p	ARRDC4
miR-495-5p	PTPN14
miR-495-5p	HEBP2
miR-495-5p	MATN2
miR-495-5p	STX7
miR-495-5p	TLR4
miR-495-5p	DNAJB4
mir-516a-5p	FAM200B
mir-516a-5p	GREM1
mir-516a-5p	ATP8B1
mir-516a-5p	DLG2
mir-516a-5p	NMT2
mir-516a-5p	STX7
mir-516a-5p	DNAJB4
miR-519-3p	FILIP1L
miR-519-3p	TENM1
miR-519-3p	MCC
miR-519-3p	LONRF2
miR-519-3p	KCNMA1
miR-519-3p	ERBB4
miR-519-3p	SYT17
miR-519-3p	CALD1
miR-519-3p	CADM2
miR-519-3p	EEA1
miR-519-3p	MINDY2
miR-519-3p	LYRM2
miR-519-3p	CRIM1
miR-519-3p	TLR4
miR-519-3p	CD177
miR-519-3p	DRAM1
miR-519-3p	THBS1
miR-519-3p	TXNIP
miR-519-3p	PDLIM3
miR-519-3p	RAPGEF5
miR-519-3p	CD44
miR-519-3p	EYA4
miR-519-3p	ZNF799
miR-519-3p	SERPINB8
miR-519-3p	DCLK1
miR-519-3p	STX7
miR-519-3p	LAYN
miR-519-3p	CCDC80
miR-519-3p	NMT2
miR-519-3p	PTPN14
miR-519-3p	DLG2
miR-519-3p	PARVA
miR-519-3p	DNAJC3
miR-519-3p	NLGN1
miR-519-3p	SERPINE1
miR-519-3p	ITGA3
miR-519-3p	GREM1
miR-519-3p	PLA2G16
miR-519-3p	BAG2
miR-519-3p	CYR61
miR-519-3p	CD99
miR-519-3p	NRXN3
mir-543	LIFR
mir-543	PDE5A
mir-543	CADM2
mir-543	NMT2
mir-543	EEA1
mir-543	DCLK1
mir-543	EYA1
mir-543	KCNMA1
mir-543	LPP
mir-543	USP53
mir-543	EYA4
mir-543	MATN2
mir-543	SLC44A5
mir-543	HEBP2
mir-543	IQGAP2
mir-543	NECAB1
mir-543	GREM1
mir-543	TENM1
mir-543	MINDY2
mir-543	PARVA
mir-543	CYR61
mir-543	NRXN3
mir-543	SERTM1
mir-543	ERBB4
mir-543	THBS1
mir-543	DNAJC3
mir-543	STX7
mir-592	DCLK1
mir-592	DLG2
mir-592	RAPGEF5
mir-592	TGFB2
mir-592	ERBB4
mir-592	PHLDB2
mir-592	NRXN3
mir-592	CD177
mir-592	LYRM2
mir-592	MATN2
mir-592	PLCE1
mir-592	SERPINB8
mir-592	ARRDC4
mir-592	HBEGF
mir-592	SEMA3D
mir-592	STX7
mir-592	LPP
mir-592	CADM2
mir-592	MCC
mir-592	CLVS2
mir-592	FLNC
mir-592	GREM1
mir-592	OSMR
mir-592	MME
mir-592	TENM1
mir-592	LAYN
mir-592	CCDC80
mir-592	HEBP2
mir-592	LONRF2
mir-592	ITGA3
mir-592	BAG2
mir-592	PLA2G16
mir-592	PDLIM3
mir-592	THBS1
mir-628-3p	ARSJ
mir-628-3p	BAG2
mir-628-3p	LPP
mir-628-3p	EEA1
mir-628-3p	SERTM1
mir-628-3p	CADM2
mir-628-3p	PDE5A
mir-628-3p	SYT4
mir-628-3p	USP53
mir-628-3p	NLGN1
mir-628-3p	RAPGEF5
mir-628-3p	ERBB4
mir-628-3p	NT5DC3
mir-628-3p	DLG2
mir-628-3p	STX7
mir-628-3p	DCLK1
mir-628-3p	CLK4
mir-628-3p	LAYN
mir-628-3p	PLA2G16
mir-628-3p	MATN2
mir-628-3p	CITED2
mir-628-3p	GPR22
mir-628-3p	ZNF322
miR-628-5p	MRAP2
miR-628-5p	ARHGAP36
miR-628-5p	LPP
miR-628-5p	STX7
miR-628-5p	PLCE1
miR-628-5p	OSMR
miR-628-5p	DNAJC3
miR-628-5p	CLVS2
miR-628-5p	SLC44A5
miR-628-5p	CRIM1
miR-628-5p	BAG2
miR-628-5p	CD44
miR-628-5p	SERTM1
miR-628-5p	ZNF799
miR-628-5p	RAPGEF5
miR-628-5p	CYP24A1
miR-628-5p	TGFB2
miR-628-5p	THBS1
miR-628-5p	EYA1
miR-628-5p	NT5DC3
miR-628-5p	EYA4
miR-628-5p	PTPN14
miR-628-5p	TXNIP
miR-628-5p	MCC
miR-628-5p	LONRF2
miR-628-5p	GFRA2
miR-628-5p	CADM2
miR-628-5p	NMT2
miR-628-5p	GREM1
miR-628-5p	GLIPR1
miR-628-5p	FAM198B
miR-628-5p	SULF2
miR-628-5p	HEBP2
miR-628-5p	ABTB2
miR-628-5p	PARVA
miR-628-5p	LAYN
miR-628-5p	SERPINB8
miR-628-5p	AHNAK
miR-628-5p	DCLK1
miR-628-5p	SEMA3D
miR-628-5p	MME
miR-628-5p	CITED2
miR-628-5p	TLR4
miR-628-5p	PLA2G16
mir-654-5p	PARVA
mir-654-5p	SLC6A17
mir-654-5p	SERPINE1
mir-654-5p	ITGA3
mir-654-5p	SERPINB8
mir-654-5p	RAPGEF5
mir-654-5p	NT5DC3
mir-654-5p	SYNJ2
mir-654-5p	MEST
mir-654-5p	KCNMA1
mir-654-5p	AXL
mir-654-5p	LIFR
mir-654-5p	FLNB
mir-654-5p	PLAT
mir-654-5p	CD99
mir-654-5p	PXDC1
mir-654-5p	EYA1
mir-654-5p	STX7
mir-654-5p	DLG2
mir-654-5p	CD44
mir-654-5p	ABTB2
mir-654-5p	HEBP2
mir-654-5p	GFRA2
mir-654-5p	LYRM2
mir-654-5p	LONRF2
mir-654-5p	TXNIP
mir-654-5p	CCDC80
mir-654-5p	LPP
mir-654-5p	BAG2
mir-654-5p	GPR22
mir-654-5p	NRXN3
mir-654-5p	DNAJB4
mir-654-5p	SPART
miR-664a-5p	LPP
miR-664a-5p	CADM2
miR-664a-5p	MINDY2
miR-664a-5p	PDE5A
miR-664a-5p	LIFR
miR-664a-5p	TGFB2
miR-664a-5p	SNCAIP
miR-664a-5p	ZNF799
miR-664a-5p	CTGF
miR-664a-5p	DCLK1
miR-664a-5p	RAPGEF5
miR-664a-5p	KCNIP1
miR-664a-5p	RDH10
miR-664a-5p	CCDC80
miR-664a-5p	CRIM1
miR-664a-5p	CD44
miR-664a-5p	SAMD9L
miR-664a-5p	SYT4
miR-664a-5p	PTPN14
miR-664a-5p	LYRM2
miR-664a-5p	HEBP2
miR-664a-5p	ITGA3
miR-664a-5p	DNAJC3
miR-664a-5p	AHNAK2
miR-664a-5p	TXNIP
miR-664a-5p	DPP4
miR-664a-5p	FLNB
miR-664a-5p	CLVS2
miR-664a-5p	LONRF2
miR-664a-5p	MME
miR-664a-5p	EYA4
miR-664a-5p	TFPI2
miR-664a-5p	STX7
miR-664a-5p	SERPINE1
miR-664a-5p	PARVA
miR-664a-5p	EEA1
miR-664a-5p	IQGAP2
miR-664a-5p	GLIPR1
miR-664a-5p	PLA2G16
miR-664a-5p	BAG2
miR-664a-5p	CD99
miR-664a-5p	ALOX5AP
miR-664a-5p	DNAJB4
mir-767-5p	HOXD10
mir-767-5p	SLC44A5
mir-767-5p	DCLK1
mir-767-5p	LPP
mir-767-5p	MEST
mir-767-5p	DLG2
mir-767-5p	HDAC9
mir-767-5p	TENM1
mir-767-5p	EYA4
mir-767-5p	AHNAK
mir-767-5p	SYNJ2
mir-767-5p	ANXA2
mir-767-5p	ARRDC4
mir-767-5p	TLR4
mir-767-5p	OSMR
mir-767-5p	SERPINB8
mir-767-5p	HIST1H3F
mir-767-5p	KCNMA1
mir-767-5p	LYRM2
mir-767-5p	MCC
mir-767-5p	ITGA3
mir-767-5p	CYP24A1
mir-767-5p	FAM200B
mir-767-5p	PARVA
mir-767-5p	GREM1
mir-767-5p	ACHE
mir-767-5p	SEMA3D
mir-767-5p	LONRF2
mir-767-5p	FLNB
mir-767-5p	CYR61
mir-767-5p	LIFR
mir-767-5p	RAPGEF5
mir-767-5p	ARSJ
mir-767-5p	NECAB1
mir-767-5p	CCDC80
mir-767-5p	HEBP2
mir-767-5p	AXL
mir-767-5p	PLA2G16
mir-767-5p	STX7
mir-767-5p	CD99
mir-95-3p	HIST1H3F
mir-95-3p	PDLIM3
mir-95-3p	SLC6A17
mir-95-3p	LIFR
mir-95-3p	LAYN
mir-95-3p	IQGAP2
mir-95-3p	CD99
mir-95-3p	ANXA5
mir-95-5p	MINDY2
mir-95-5p	TGFB2
mir-95-5p	ABTB2
mir-95-5p	PARVA
mir-95-5p	LPP
mir-95-5p	NRXN3
mir-95-5p	SPART
mir-95-5p	TENM1
mir-95-5p	EYA4
mir-95-5p	SYT17
mir-95-5p	DCLK1
mir-95-5p	ARRDC4
mir-95-5p	PDLIM3
mir-95-5p	DNAJB4
mir-95-5p	TFPI2
mir-95-5p	NT5DC3
mir-95-5p	RAPGEF5
mir-95-5p	CD44
mir-95-5p	ARHGAP36
mir-95-5p	CADM2
mir-95-5p	EEA1
mir-95-5p	SEMA3D
mir-95-5p	FAM198B
mir-95-5p	LONRF2
mir-95-5p	CLVS2
mir-95-5p	NECAB1
mir-95-5p	PXDC1
mir-95-5p	ZNF799
mir-95-5p	NLGN1
mir-95-5p	ARSJ
mir-95-5p	CCDC80
mir-95-5p	SERTM1
mir-95-5p	HIST1H3F
mir-95-5p	STX7
mir-95-5p	DRAM1
mir-95-5p	PLA2G16
mir-95-5p	EYA1
mir-95-5p	ERBB4
mir-95-5p	HDAC9
mir-95-5p	SERPINB8
mir-95-5p	HBEGF
mir-95-5p	GFRA2
mir-95-5p	DPP4
mir-95-5p	DLG2
mir-95-5p	SYT4
mir-95-5p	GREM1
mir-95-5p	PTPN14
mir-95-5p	SEL1L3
mir-95-5p	HEBP2
mir-95-5p	LIFR
mir-95-5p	PHLDB2
mir-95-5p	MCC
mir-95-5p	NMT2
mir-95-5p	PDE5A
mir-95-5p	SULF2
mir-95-5p	CLK4
mir-95-5p	ITGA3
mir-95-5p	BAG2
mir-95-5p	GLIPR1
mir-95-5p	THBS1
mir-95-5p	VIM
mir-95-5p	TLR4
mir-95-5p	ANXA5
